# Supplementary material for: Prioritizing COVID-19 vaccination efforts and dose allocation within Madagascar
Source: Springer Nature journal article supplement (doi:10.1186/s12889-022-13150-8), 2022-04-12

**Figure S2: The estimated reduction in mortality for each vaccine allocation strategy given different  $R_0$ .** The reduction in mortality by allocation strategy for stochastic simulations assuming vaccine acceptance of 70%, rollout speed where 50% of health care workers were mandated to vaccinate 20 people a day, start day of 10 days following initial seeding event, and the number of total doses equals 20% of the population with A)  $R_0=2.5$  as estimated in [16] and B)  $R_0=5.08$  as estimated for the Delta variant [19].

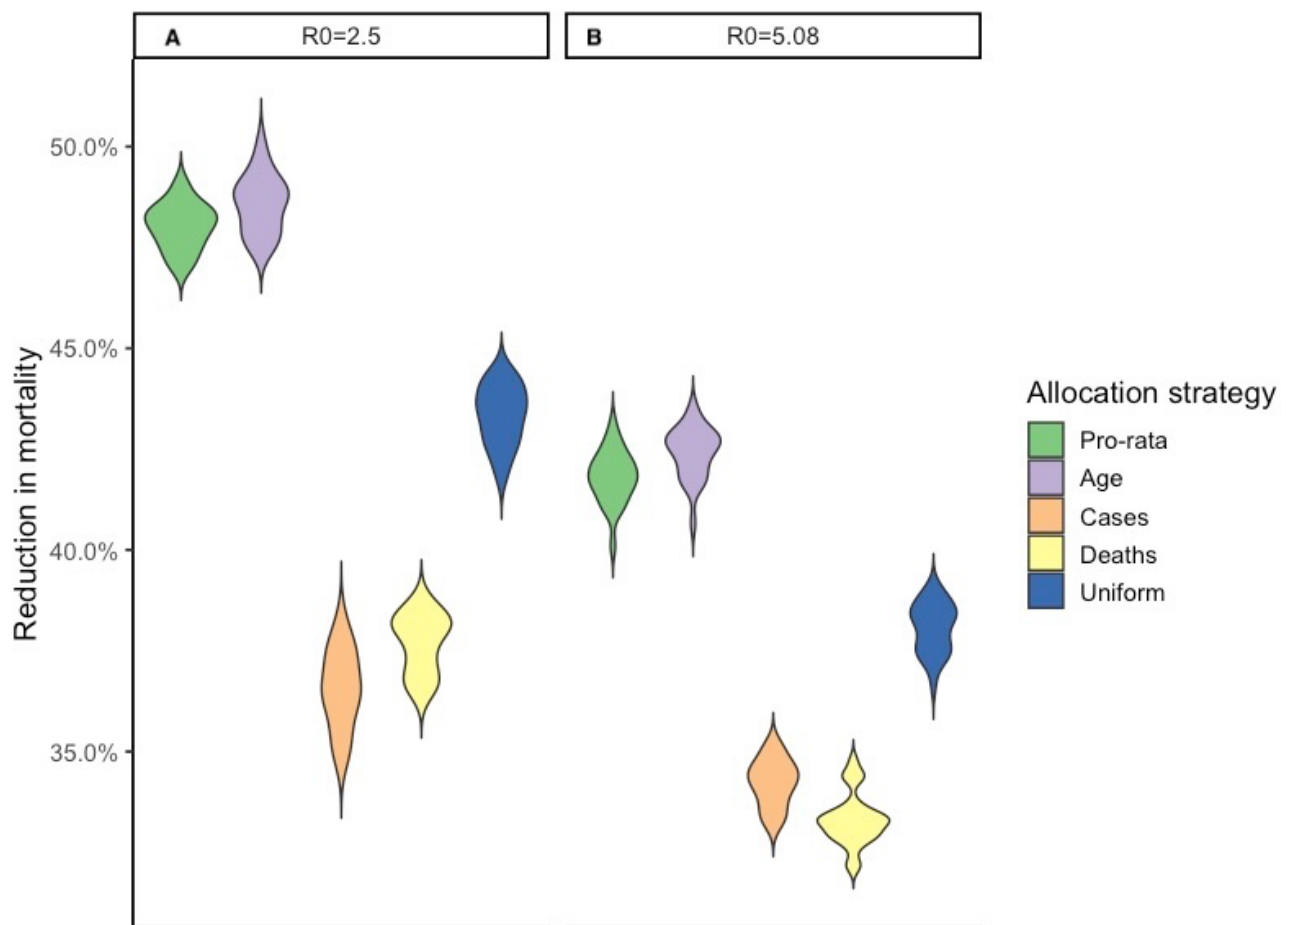

Supplement: MOESM2 [file 20305930]
